# Supplementary material for: De novo transcriptome assembly for the spiny mouse (Acomys cahirinus)
Source: PubMed Central journal article supplement (PMC5566366; doi:10.1038/s41598-017-09334-7), 2017-08-21
Supplement: 41598_2017_9334_MOESM1_ESM.pdf [file 41598_2017_9334_MOESM1_ESM.pdf]

# *De novo* transcriptome assembly for the spiny mouse (*Acomys cahirinus*)

Jared Mamrot, Roxane Legaie, Stacey J Ellery, Trevor Wilson, Torsten Seemann, David R. Powell, David K. Gardner, David W. Walker, Peter Temple-Smith, Anthony T. Papenfuss, Hayley Dickinson

## Supplementary Figures



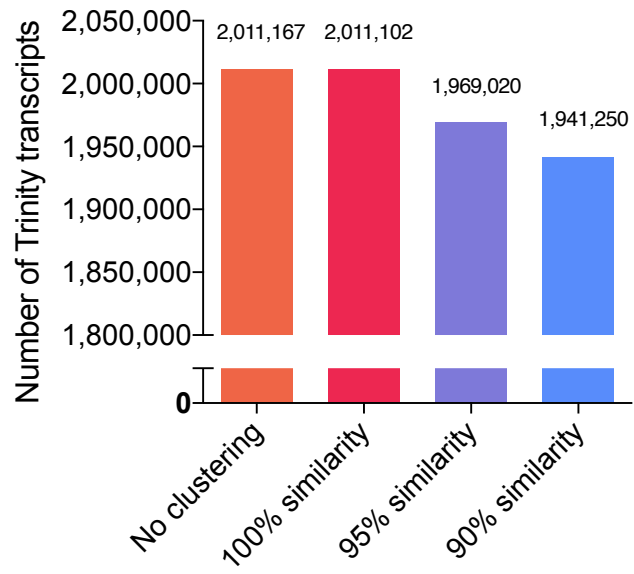

Supplementary Figure S2: Number of Trinity transcripts after CD-HIT-EST clustering at specified thresholds (100%, 95%, 90%).

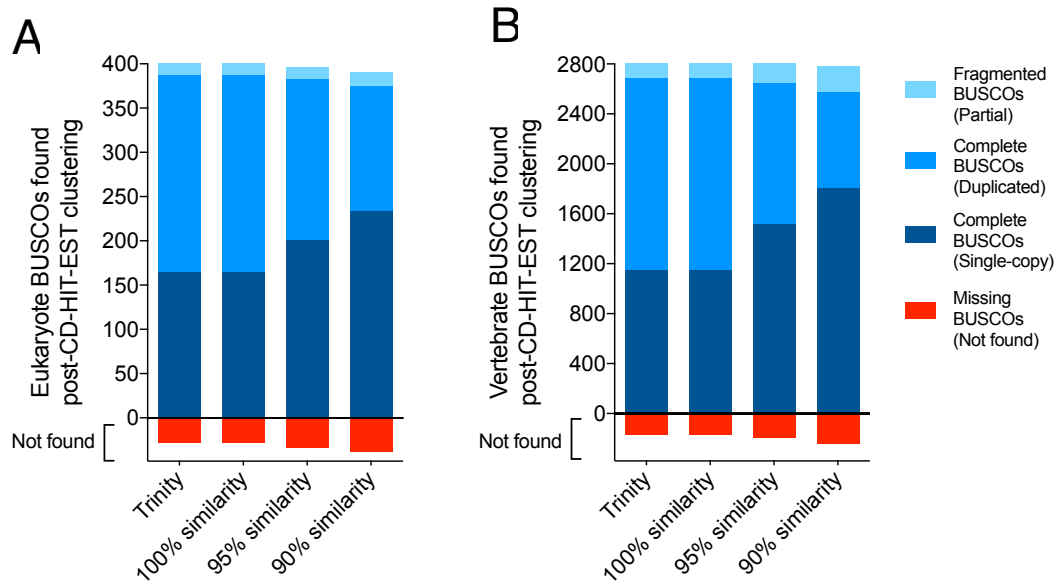

Supplementary Figure S3: BUSCO analysis after CD-HIT-EST clustering at specified thresholds (100%, 95%, 90%). (A) Eukaryota, (B) Vertebrata

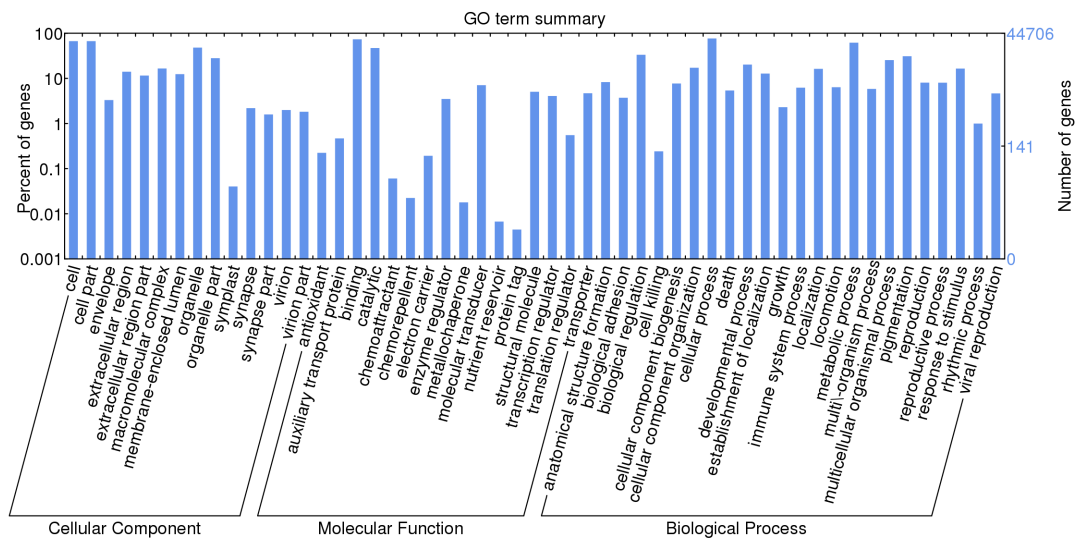

Supplementary Figure S4: Summary of gene ontology (GO) terms associated with SwissProt/UniProt blast hits.

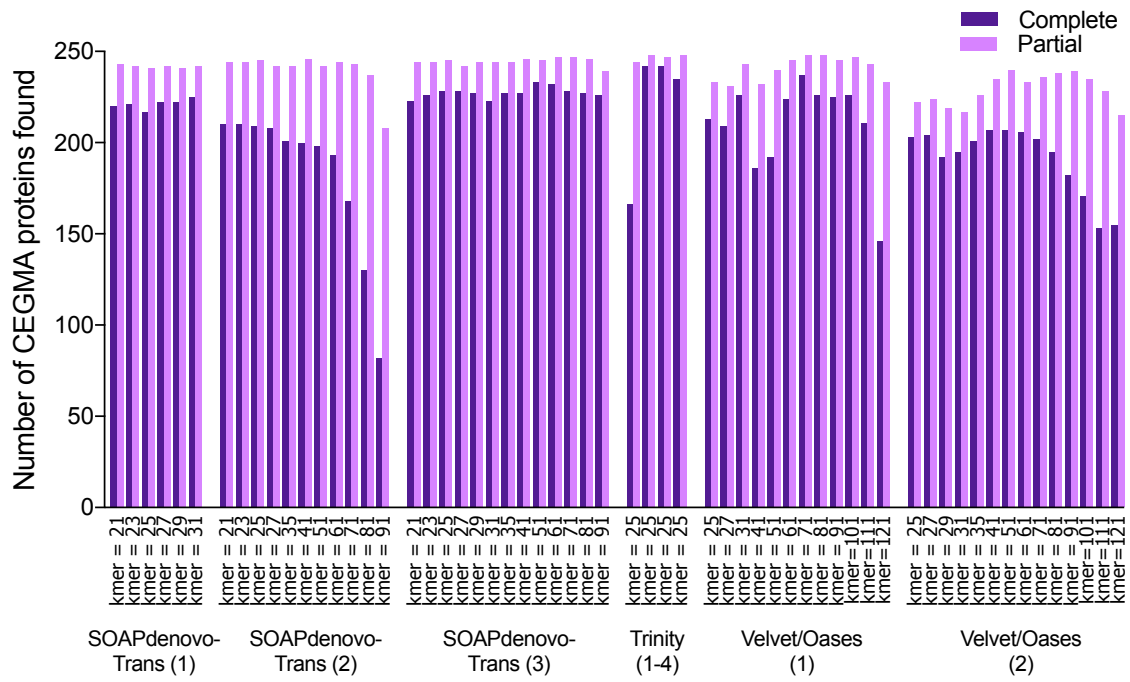

Supplementary Figure S5: Number of complete/partial CEGMA proteins found in each assembly.

Table S1. Summary statistics for RNASeq runs.

|                      | Forward reads |               | Reverse reads |               | Total     |
|----------------------|---------------|---------------|---------------|---------------|-----------|
| Yield Total (G)      | 45.9          |               | 45.9          |               | 91.77617  |
| Aligned (%)          | 0.45          |               | 0.25          |               | 0.3509741 |
| Error Rate (%)       | 0.62          |               | 1.6           |               | 1.003602  |
| Intensity Cycle 1    | 3255          |               | 3054          |               | 3154.379  |
| % >= Q30             | 80.5          |               | 46.5          |               | 63.47869  |
| Lane                 | 1             | 2             | 1             | 2             |           |
| Tiles                | 64            | 64            | 64            | 64            |           |
| Density (K/mm2)      | 1209 ± 78     | 1242 ± 72     | 1209 ± 78     | 1242 ± 72     |           |
| Clusters PF (%)      | 64.69 ± 14    | 69.66 ± 10    | 64.69 ± 14    | 69.66 ± 10    |           |
| Phas/Prephas (%)     | 0.157 / 0.202 | 0.151 / 0.209 | 0.076 / 0.121 | 0.100 / 0.164 |           |
| Reads (M)            | 222.79        | 228.94        | 222.79        | 228.94        |           |
| Reads PF (M)         | 145.46        | 160.46        | 145.46        | 160.46        |           |
| % >= Q30             | 80.2          | 80.7          | 42.1          | 50.4          |           |
| Yield(G)             | 22            | 24            | 22            | 24            |           |
| Cycles Err Rated     | 150           | 150           | 0 150 0 150   |               |           |
| Aligned (%)          | 0.44 ± 0.06   | 0.46 ± 0.05   | 0.22 ± 0.20   | 0.28 ± 0.20   |           |
| Error Rate (%)       | 0.65 ± 0.30   | 0.59 ± 0.24   | 1.59 ± 0.51   | 1.61 ± 0.90   |           |
| Error Rate 35 cycle  | 0.33 ± 0.26   | 0.24 ± 0.21   | 0.89 ± 0.39   | 0.95 ± 0.61   |           |
| Error Rate 75 cycle  | 0.38 ± 0.27   | 0.31 ± 0.22   | 1.27 ± 0.51   | 1.18 ± 0.60   |           |
| Error Rate 100 cycle | 0.44 ± 0.27   | 0.38 ± 0.29   | 1.35 ± 0.52   | 1.30 ± 0.69   |           |
| Intensity Cycle 1    | 3285 ± 266    | 3225 ± 264    | 2995 ± 1829   | 3113 ± 1678   |           |

Supplementary Table S2: EvidentialGene tr2aacds pipeline output (class tables)

Class Table for Tr2aacds\_v1

| class      | okay | drop | okay   | drop  |
|------------|------|------|--------|-------|
| althi      | 11.2 | 1.2  | 112390 | 12098 |
| althi1     | 6.1  | 1.5  | 61522  | 15135 |
| althia2    | 0    | 0    | 0      | 629   |
| altmfrag   | 0.2  | 0    | 2272   | 364   |
| altmfraga2 | 0    | 0    | 171    | 21    |
| altmid     | 0.8  | 0    | 8259   | 856   |
| altmida2   | 0.1  | 0    | 1276   | 84    |
| main       | 11.1 | 0.6  | 112092 | 6870  |
| maina2     | 0.2  | 0    | 2865   | 629   |
| noclass    | 58.5 | 6.1  | 587241 | 61278 |
| noclassa2  | 0    | 0    | 372    | 98    |
| parthi     | 0    | 1.2  | 0      | 12337 |
| parthi1    | 0    | 0.3  | 0      | 3918  |
| parthia2   | 0    | 0    | 0      | 511   |

-----  
total            88.5            11.4            888460            114828  
=====

# AA-quality for okay set (no okalt): all and longest 1000 summary

|          | n      | average | median | min,max     | sum      | gaps        |
|----------|--------|---------|--------|-------------|----------|-------------|
| okay.top | 1000   | 2138    | 1837   | 1397, 29738 | 2138352  | 110, 0.1    |
| okay.all | 702570 | 100     | 83     | 40, 29738   | 70957577 | 224333, 0.3 |

Class Table for Tr2aacds\_v2

| class      | okay | drop | okay   | drop    |
|------------|------|------|--------|---------|
| althi      | 1.9  | 18.2 | 239423 | 2211673 |
| althi1     | 1.1  | 17   | 133676 | 2065173 |
| althia2    | 0    | 0.2  | 0      | 26395   |
| altmfrag   | 0    | 0.2  | 3396   | 27243   |
| altmfraga2 | 0    | 0    | 324    | 1285    |
| altmid     | 0.1  | 1    | 16618  | 122236  |
| altmida2   | 0    | 0.1  | 3081   | 13216   |
| main       | 3.3  | 15.7 | 406187 | 1916052 |
| maina2     | 0    | 0.5  | 10564  | 63529   |
| noclass    | 1.8  | 29.1 | 221430 | 3532448 |
| noclassa2  | 0    | 0    | 425    | 4697    |
| parthi     | 0    | 6.5  | 0      | 790178  |
| parthi1    | 0    | 2.3  | 0      | 279538  |
| parthia2   | 0    | 0.3  | 0      | 43112   |

-----  
total            8.5            91.4            1035124            11096775  
=====

# AA-quality for okay set (no okalt): all and longest 1000 summary

|          | n      | average | median | min,max     | sum      | gaps        |
|----------|--------|---------|--------|-------------|----------|-------------|
| okay.top | 1000   | 2096    | 1799   | 1372, 29738 | 2096967  | 344, 0.3    |
| okay.all | 638606 | 104     | 91     | 40, 29738   | 66481461 | 211449, 0.3 |
